# Supplementary material for: The Significance of Selecting an Appropriate Patient-Reported Outcome Measure (PROM): A Cross-Cultural Adaptation of the Specific Paediatric International Documentation Committee Subjective (Pedi-IKDC) Knee Form
Source: MDPI journal article supplement (doi:10.3390/children10121930), 2023-12-14
Supplement: s1 [file s1]

**BENDROJI INFORMACIJA**

1. Tyrimo ID:                   — — —
2. Užpildymo diena:       — — / — — / — — — —  
                                      MMMM MM       DD

**APKLAUSA**

Kelio traumos data:       — — / — — / — — — —  
                                      MMMM MM       DD

**Norėtume sužinoti daugiau apie tavo traumotą kelio sąnarį. Kiekvienas klausimas prašo pateikti skirtingą informaciją apie tavo traumotą kelio sąnarį. Prašome atsakyti į visus toliau pateiktus klausimus.**

**SIMPTOMAI**

1. Jei tavęs paprašytų atlikti toliau nurodytus veiksmus, nurodyk intensyviausius veiksmus, kuriuos galėtum atlikti šiandien, nesukeliant stipraus traumoto kelio **skausmo**?

- ☐<sub>1</sub> Labai intensyvius veiksmus, kaip šuolius ar greitą krypties keitimą, pvz. žaidžiant krepšinį ar futbolą
- ☐<sub>2</sub> Intensyvius veiksmus, pvz. kilnoti sunkumus, slidinėti ar žaisti tenisą
- ☐<sub>3</sub> Vidutiniškai intensyvius veiksmus, pvz. greitai eiti ar bėgioti
- ☐<sub>4</sub> Nedidelio intensyvumo veiksmus, pvz. eiti normalia sparta
- ☐<sub>5</sub> Negaliu atlikti nei vieno iš anksčiau nurodytų veiksmų, kadangi dabar man labai skauda kelią

2. Per pastarąsias 4 savaites arba nuo patirtos kelio sąnario traumos, kiek laiko skaudėjo traumotas kelio sąnarys?

|                               |                          |                          |                          |                          |                          |                          |                          |                          |                          |                          |                          |                                |
|-------------------------------|--------------------------|--------------------------|--------------------------|--------------------------|--------------------------|--------------------------|--------------------------|--------------------------|--------------------------|--------------------------|--------------------------|--------------------------------|
| <b>Niekada<br/>neskaudėjo</b> | 0                        | 1                        | 2                        | 3                        | 4                        | 5                        | 6                        | 7                        | 8                        | 9                        | 10                       | <b>Skaudėjo<br/>visą laiką</b> |
|                               | <input type="checkbox"/> |                                |

3. Kaip stipriai šiandien skauda traumotas kelio sąnarys?

|                           |                          |                          |                          |                          |                          |                          |                          |                          |                          |                          |                          |                                                               |
|---------------------------|--------------------------|--------------------------|--------------------------|--------------------------|--------------------------|--------------------------|--------------------------|--------------------------|--------------------------|--------------------------|--------------------------|---------------------------------------------------------------|
| <b>Visai<br/>neskauda</b> | 0                        | 1                        | 2                        | 3                        | 4                        | 5                        | 6                        | 7                        | 8                        | 9                        | 10                       | <b>Skauda<br/>taip, kad<br/>sunku<br/>pakelti<br/>skausmą</b> |
|                           | <input type="checkbox"/> |                                                               |

4. Per pastarąsias 4 savaites arba nuo patirtos traumos, kaip sunku **buvo judinti arba lankstyti** traumotą kelio sąnarį?

- ☐<sub>1</sub> Visai nesunku
- ☐<sub>2</sub> Šiek tiek sunku
- ☐<sub>3</sub> Vidutiniškai sunku
- ☐<sub>4</sub> Labai sunku
- ☐<sub>5</sub> Ypač sunku

5. Per pastarąsias 4 savaites arba nuo patirtos traumos, kiek **sutinęs** buvo traumuotas kelio sąnarys?
- ☐<sub>1</sub> Visai nesutinęs  
☐<sub>2</sub> Šiek tiek sutinęs  
☐<sub>3</sub> Vidutiniškai sutinęs  
☐<sub>4</sub> Labai sutinęs  
☐<sub>5</sub> Ypač sutinęs
6. Jei tavęs paprašytų atlikti toliau nurodytus veiksmus, nurodyk intensyviausius veiksmus, kuriuos galėtum atlikti šiandien, nesukeliant matomo traumuoto kelio sąnario **tinimo**?
- ☐<sub>1</sub> Labai intensyviuos veiksmus, kaip šuolius ar greitą krypties keitimą, pvz. žaidžiant krepšinį ar futbolą  
☐<sub>2</sub> Intensyviuos veiksmus, pvz. kilnoti sunkumus, slidinėti ar žaisti tenisą  
☐<sub>3</sub> Vidutiniškai intensyviuos veiksmus, pvz. greitai eiti ar bėgioti  
☐<sub>4</sub> Nedidelio intensyvumo veiksmus, pvz. eiti normalia sparta  
☐<sub>5</sub> Negaliu atlikti nei vieno iš anksčiau nurodytų veiksmų, kadangi mano kelis yra sutinęs net ilsintis
7. Per pastarąsias 4 savaites arba nuo patirtos kelio sąnario traumos, ar traumuotas kelio sąnarys buvo **užstrigęs (užsikirtęs)** taip, kad negalėjai jo lankstyti?
- Taip** ☐<sub>1</sub> **Ne** ☐<sub>2</sub>
8. Per pastarąsias 4 savaites arba nuo patirtos kelio sąnario traumos, ar patyrei pojūtį, kad tavo kelio sąnarys **stringa (kliūna)**, tačiau vis tiek galėjai jį lankstyti?
- Taip** ☐<sub>1</sub> **Ne** ☐<sub>2</sub>
9. Jei tavęs paprašytų atlikti toliau nurodytus veiksmus, nurodyk intensyviausius veiksmus, kuriuos galėtum atlikti šiandien be pojūčio, **kad traumuotas kelio sąnarys neišlaikys manęs ar nefunkcionuos?**
- ☐<sub>1</sub> Labai intensyviuos veiksmus, kaip šuolius ar greitą krypties keitimą, pvz. žaidžiant krepšinį ar futbolą  
☐<sub>2</sub> Intensyviuos veiksmus, pvz. kilnoti sunkumus, slidinėti ar žaisti tenisą  
☐<sub>3</sub> Vidutiniškai intensyviuos veiksmus, pvz. greitai eiti ar bėgioti  
☐<sub>4</sub> Nedidelio intensyvumo veiksmus, pvz. eiti normalia sparta  
☐<sub>5</sub> Negaliu atlikti nei vieno iš anksčiau nurodytų veiksmų, kadangi jaučiu, kad traumuotas kelio sąnarys neišlaikys manęs ant kojų

## SPORTINĖ VEIKLA

10. Kokius intensyviausius veiksmus gali atlikti reguliariai (**ilgą laiką**) **traumuotu keliu**?
- ☐<sub>1</sub> Labai intensyviuos veiksmus, kaip šuolius ar greitą krypties keitimą, pvz. žaidžiant krepšinį ar futbolą  
☐<sub>2</sub> Intensyviuos veiksmus, pvz. kilnoti sunkumus, slidinėti ar žaisti tenisą  
☐<sub>3</sub> Vidutiniškai intensyviuos veiksmus, pvz. greitai eiti ar bėgioti  
☐<sub>4</sub> Nedidelio intensyvumo veiksmus, pvz. eiti normalia sparta  
☐<sub>5</sub> Dažniausiai negaliu atlikti nei vieno iš anksčiau nurodytų veiksmų

11. Ar traumuotas kelio sąnarys įtakoja tavo gebėjimą:

|                                                                    | Ne,<br>visai ne | Taip,<br>šiek tiek | Taip,<br>vidutiniškai | Taip,<br>labai | Negaliu |
|--------------------------------------------------------------------|-----------------|--------------------|-----------------------|----------------|---------|
| a. Lipti laiptais į viršų?                                         | 1               | 2                  | 3                     | 4              | 5       |
| b. Lipti laiptais žemyn?                                           | 1               | 2                  | 3                     | 4              | 5       |
| c. Atsiklaupti ant traumuoto kelio?                                | 1               | 2                  | 3                     | 4              | 5       |
| d. Pritūpti kaip beisbolo gaudytojas?                              | 1               | 2                  | 3                     | 4              | 5       |
| e. Sėdėti kėdėje sulenkus kelius ir remiantis visa pėda į grindis? | 1               | 2                  | 3                     | 4              | 5       |
| f. Pasikelti nuo kėdės?                                            | 1               | 2                  | 3                     | 4              | 5       |
| g. Bėgti?                                                          | 1               | 2                  | 3                     | 4              | 5       |
| h. Pašokti ir nusileisti ant traumuoto kelio?                      | 1               | 2                  | 3                     | 4              | 5       |
| i. Staigiai pradėti judėti ir sustoti?                             | 1               | 2                  | 3                     | 4              | 5       |

## FUNKCIJA

12. Kaip gerai funkcionavo tavo kelio sąnarys **iki patiriant traumą?**

|                              |                          |                          |                          |                          |                          |                          |                          |                          |                          |                          |                          |                                           |
|------------------------------|--------------------------|--------------------------|--------------------------|--------------------------|--------------------------|--------------------------|--------------------------|--------------------------|--------------------------|--------------------------|--------------------------|-------------------------------------------|
| Negalėjau<br>nieko<br>daryti | 0                        | 1                        | 2                        | 3                        | 4                        | 5                        | 6                        | 7                        | 8                        | 9                        | 10                       | Galėjau<br>daryti<br>viską, ką<br>norėjau |
|                              | <input type="checkbox"/> |                                           |

13. Kaip gerai funkcionuoja kelio sąnarys **šiuo metu?**

|                               |                          |                          |                          |                          |                          |                          |                          |                          |                          |                          |                          |                                          |
|-------------------------------|--------------------------|--------------------------|--------------------------|--------------------------|--------------------------|--------------------------|--------------------------|--------------------------|--------------------------|--------------------------|--------------------------|------------------------------------------|
| Aš<br>negaliu<br>nieko daryti | 0                        | 1                        | 2                        | 3                        | 4                        | 5                        | 6                        | 7                        | 8                        | 9                        | 10                       | Aš galiu<br>daryti<br>viską, ką<br>noriu |
|                               | <input type="checkbox"/> |                                          |

14. Kas užpildė klausimyną? ☐<sub>1</sub> Vaikas savarankiškai ☐<sub>2</sub> Vaikas su tėvų / suaugusiųjų pagalba

15. Klausimyno užpildymo data \_\_\_\_ / \_\_\_\_ / \_\_\_\_  
MMMM MM DD
